# Supplementary material for: Effects of Temperature on Transparent Exopolymer Particle Production and Organic Carbon Allocation of Four Marine Phytoplankton Species
Source: MDPI journal article supplement (doi:10.3390/biology11071056), 2022-07-14
Supplement: s1 [file s1]

# Supplementary material

Table S1. Specific growth rates of the four phytoplankton species.

| Temperature (°C) | Growth rate (d <sup>-1</sup> ) |                   |                      |                      |
|------------------|--------------------------------|-------------------|----------------------|----------------------|
|                  | <i>P. micans</i>               | <i>C. affinis</i> | <i>N. closterium</i> | <i>S. trichoidea</i> |
| 16               | 0.184±0.029**                  | 0.506±0.02        | 0.413±0.011          | 0.107±0.004          |
| 20               | 0.261±0.015                    | 0.532±0.007       | 0.705±0.014          | 0.118±0.007          |
| 24               | 0.291±0.014                    | 0.524±0.008       | 0.993±0.01**         | 0.123±0.007          |

\*\* :  $P < 0.05$

Table S2. TEP concentration of *S. trichoidea*

| Temperature | TEP conc.per liter (µg Xeq./L) | TEP conc.per Chl <i>a</i> (µg Xeq./L) |
|-------------|--------------------------------|---------------------------------------|
| 16°C        | 1325.18±101.94                 | 8.2015±1.12                           |
| 20°C        | 1427.11±134.85                 | 7.78647±0.58                          |
| 24°C        | 1868.84±77.86**                | 7.34563±0.19                          |

\*\* :  $P < 0.05$
